# Supplementary material for: Nanoarchitectonics with cetrimonium bromide on metal nanoparticles for linker-free detection of toxic metal ions and catalytic degradation of 4-nitrophenol
Source: publisher site journal article supplement (doi:10.3762/bjnano.15.106), 2024-11-04
Supplement: Additional file 1 [file 2190-4286-15-106-S1.pdf]

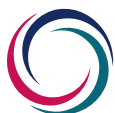

## Supporting Information

for

### **Nanoarchitectonics with cetrimonium bromide on metal nanoparticles for linker-free detection of toxic metal ions and catalytic degradation of 4-nitrophenol**

Akash Kumar and Raja Gopal Rayavarapu

*Beilstein J. Nanotechnol.* **2024**, *15*, 1312–1332. [doi:10.3762/bjnano.15.106](https://doi.org/10.3762/bjnano.15.106)

## Additional figures

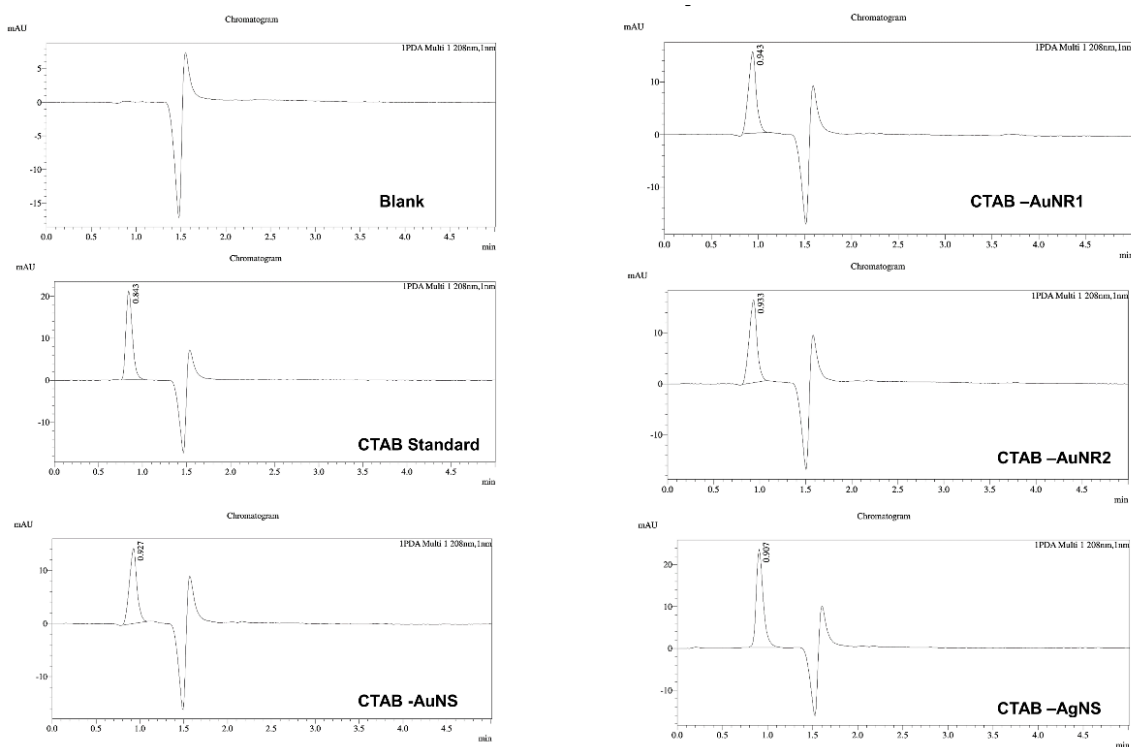

**Figure S1:** HPLC chromatogram of parent CTAB along with CTAB capped AuNS, AgNS, AuNR1 and AuNR2.

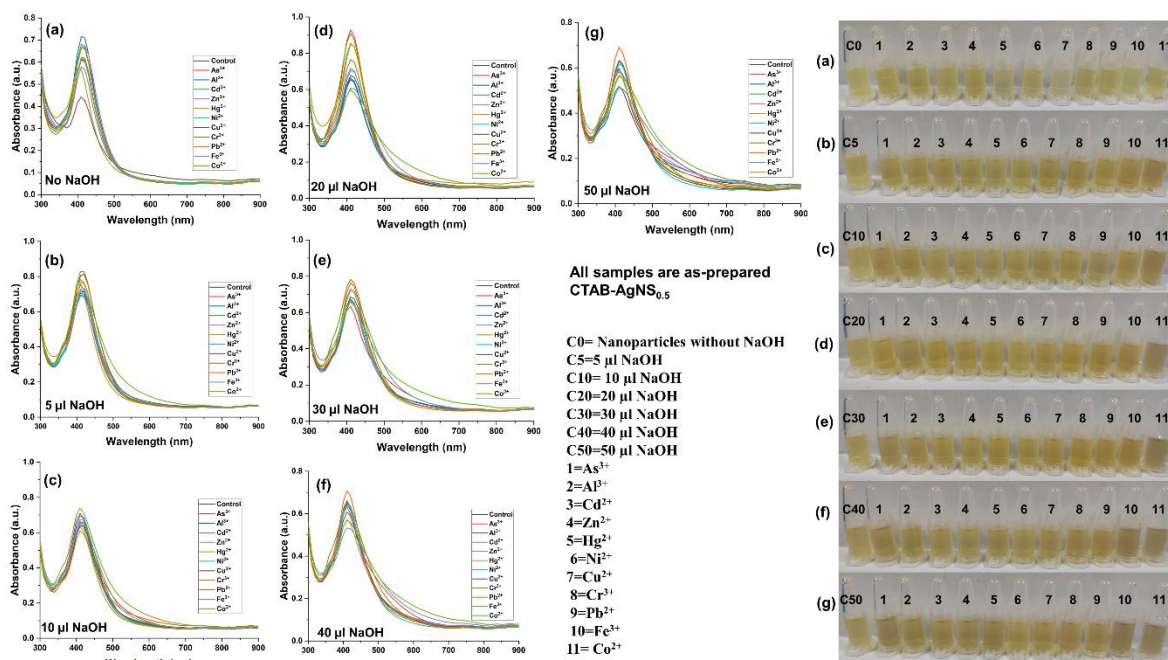

**Figure S2:** Spectrophotometric and colorimetric detection of heavy metal ions using as-prepared CTAB-AgNS at 0.5 OD in the absence (a) and presence (b-g) of NaOH (5-50 µL).

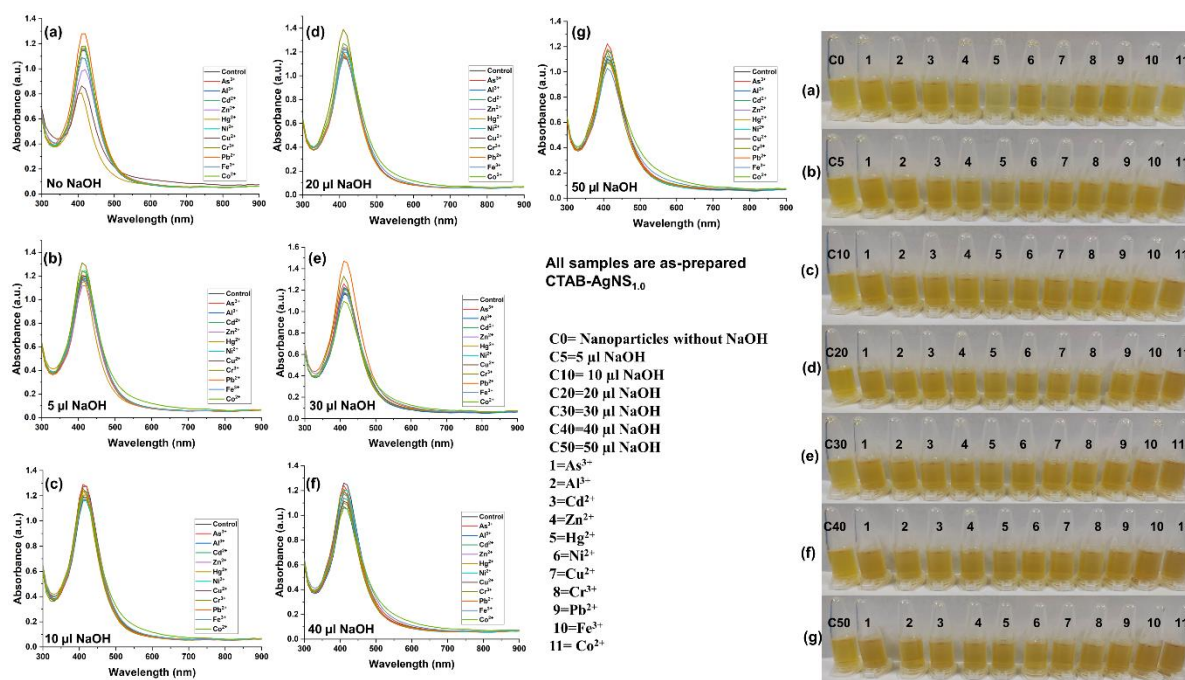

**Figure S3:** Spectrophotometric and colorimetric detection of heavy metal ions using as-prepared CTAB-AgNS at 1 OD in the absence (a) and presence (b-g) of NaOH (5-50 µL).

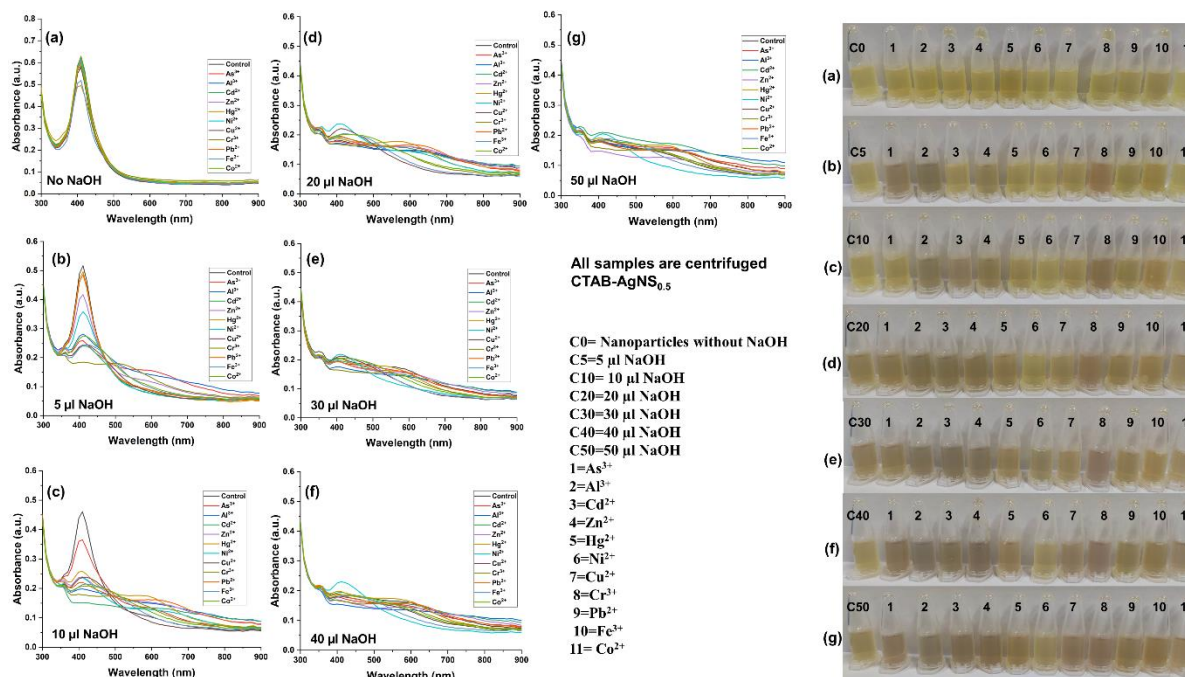

**Figure S4:** Spectrophotometric and colorimetric detection of heavy metal ions using centrifuged CTAB-AgNS at 0.5 OD in the absence (a) and presence (b-g) of NaOH (5-50 µL).

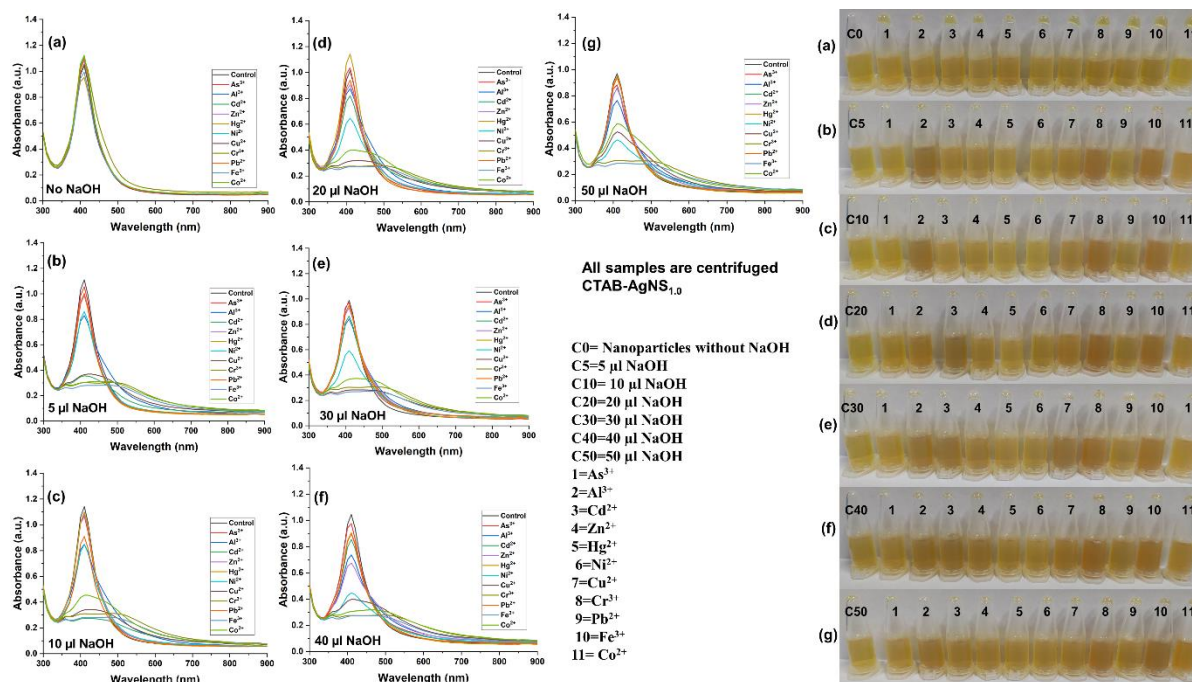

**Figure S5:** Spectrophotometric and colorimetric detection of heavy metal ions using centrifuged CTAB-AgNS at 1 OD in the absence (a) and presence (b-g) of NaOH (5-50 µL).

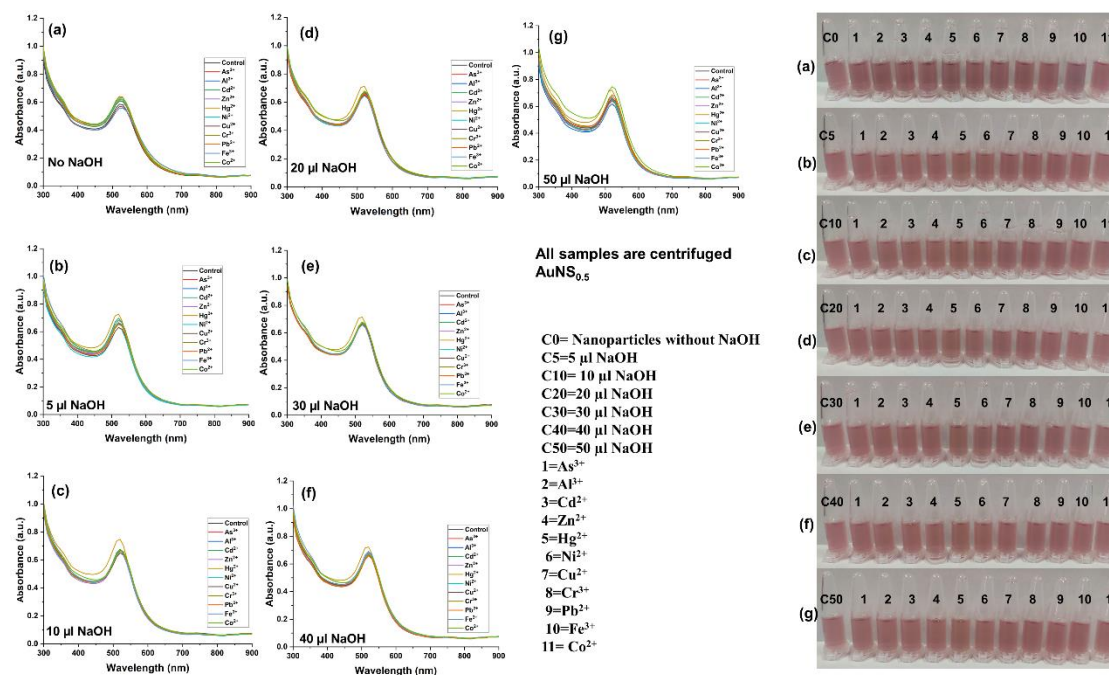

**Figure S6:** Spectrophotometric and colorimetric detection of heavy metal ions using centrifuged CTAB-AuNS at 0.5 OD in the absence (a) and presence (b-g) of NaOH (5-50 µL).



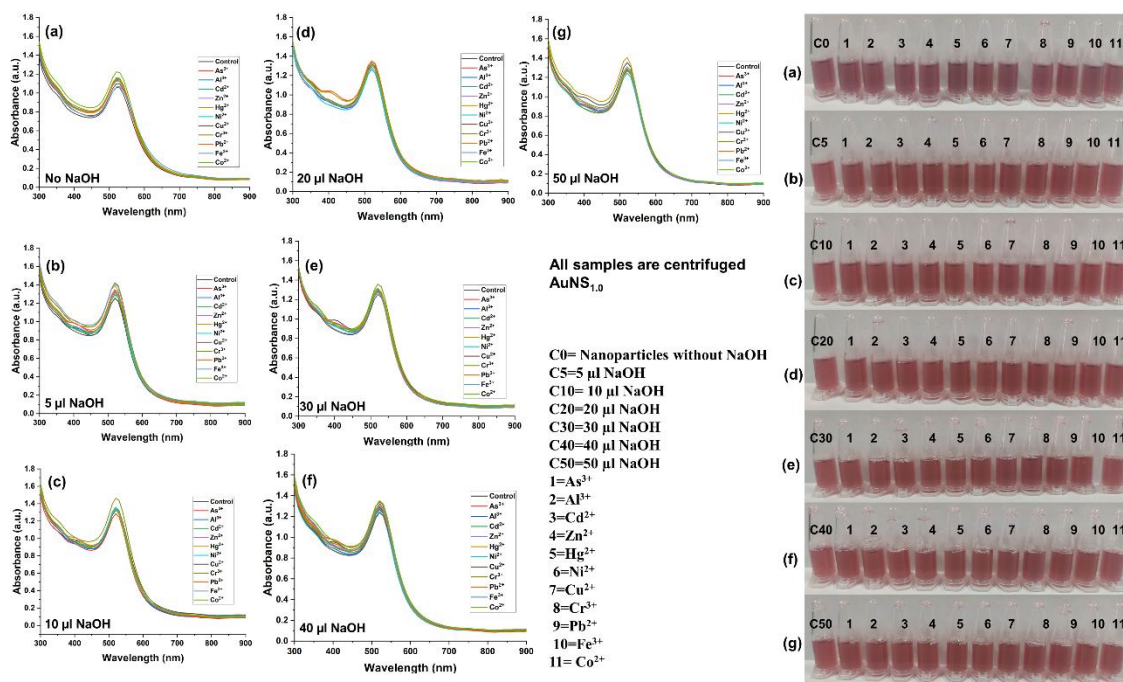

**Figure S7:** Spectrophotometric and colorimetric detection of heavy metal ions using centrifuged CTAB-AuNS at 1 OD in the absence (a) and presence (b-g) of NaOH (5-50  $\mu\text{L}$ ).

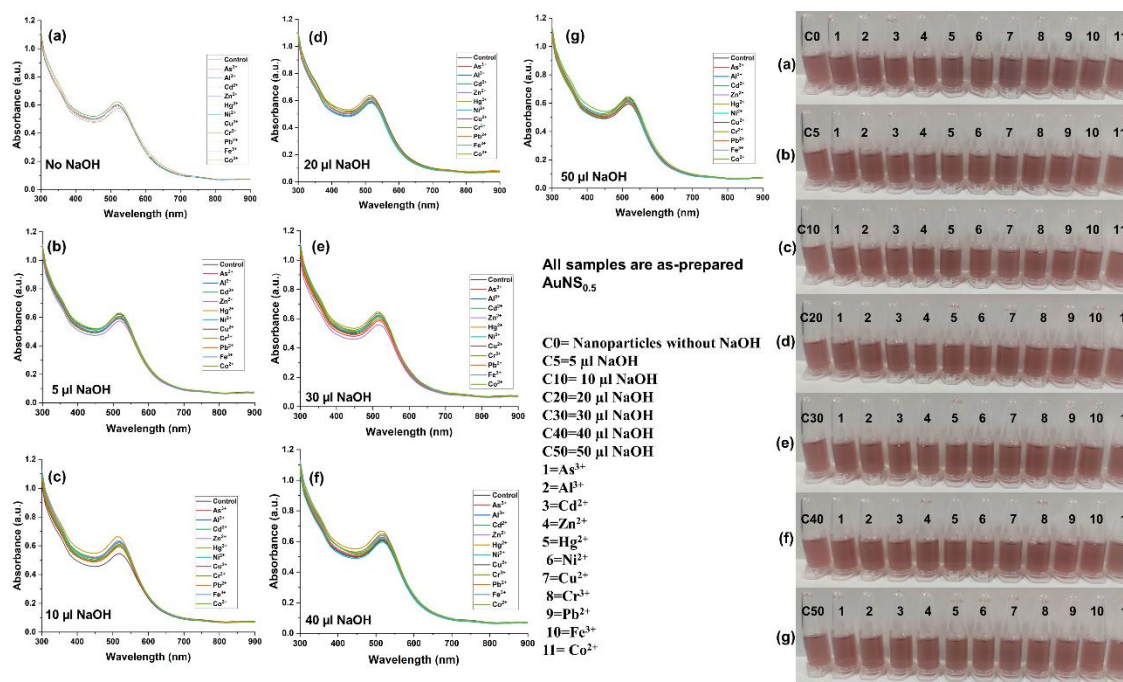

**Figure S8:** Spectrophotometric and colorimetric detection of heavy metal ions using as-prepared CTAB-AuNS at 0.5 OD in the absence (a) and presence (b-g) of NaOH (5-50  $\mu\text{L}$ ).

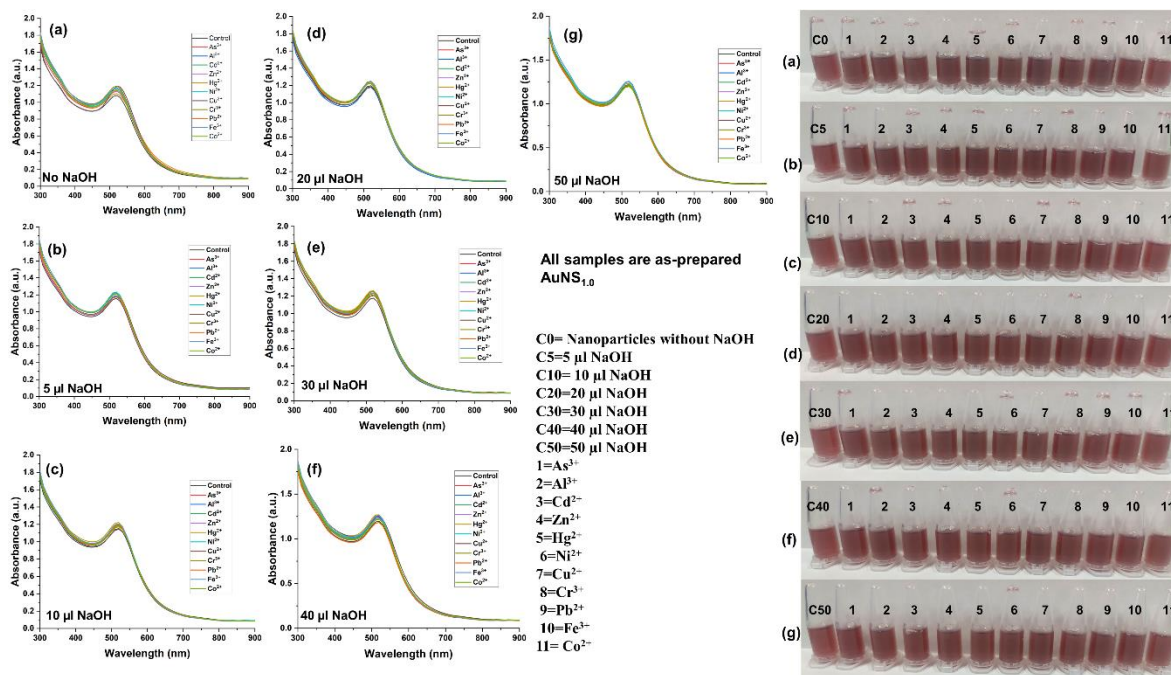

**Figure S9:** Spectrophotometric and colorimetric detection of heavy metal ions using as-prepared CTAB-AuNS at 1 OD in the absence (a) and presence (b-g) of NaOH (5-50 µL).

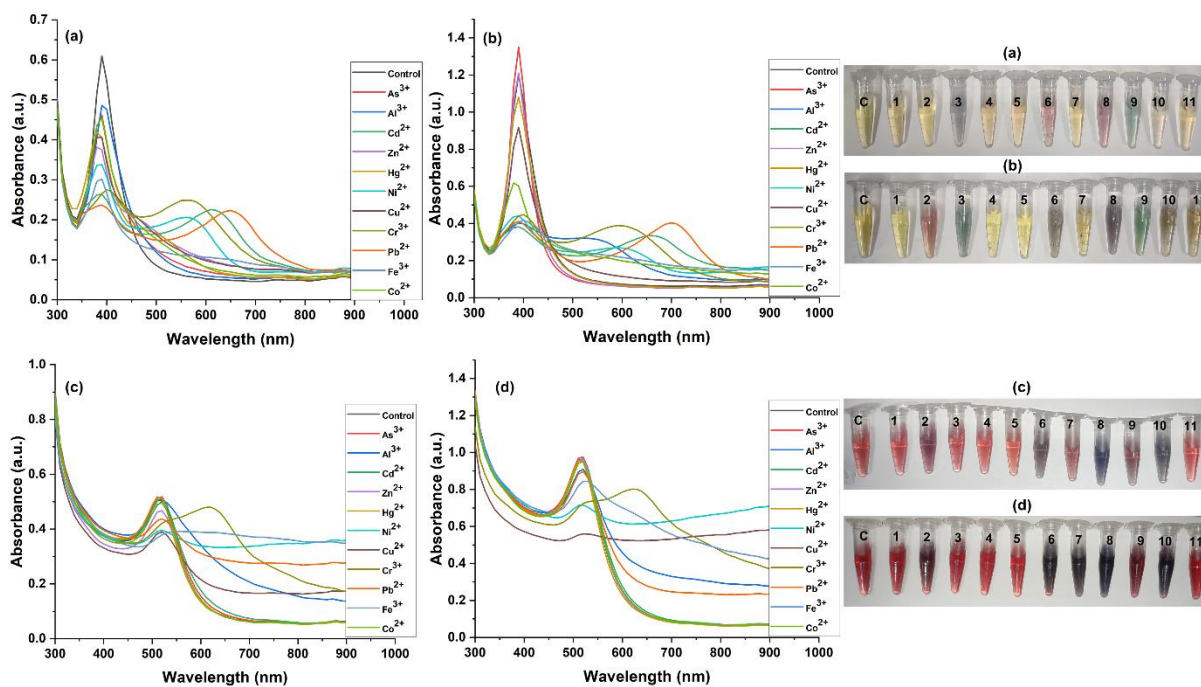

**Figure S10:** Spectrophotometric and colorimetric detection of heavy metal ions: a) and b) (Bare AgNS at 0.5 and 1 OD), c) and d) (Bare AuNS at 0.5 and 1 OD). The C represents control sample without metal ions in colorimetric images.



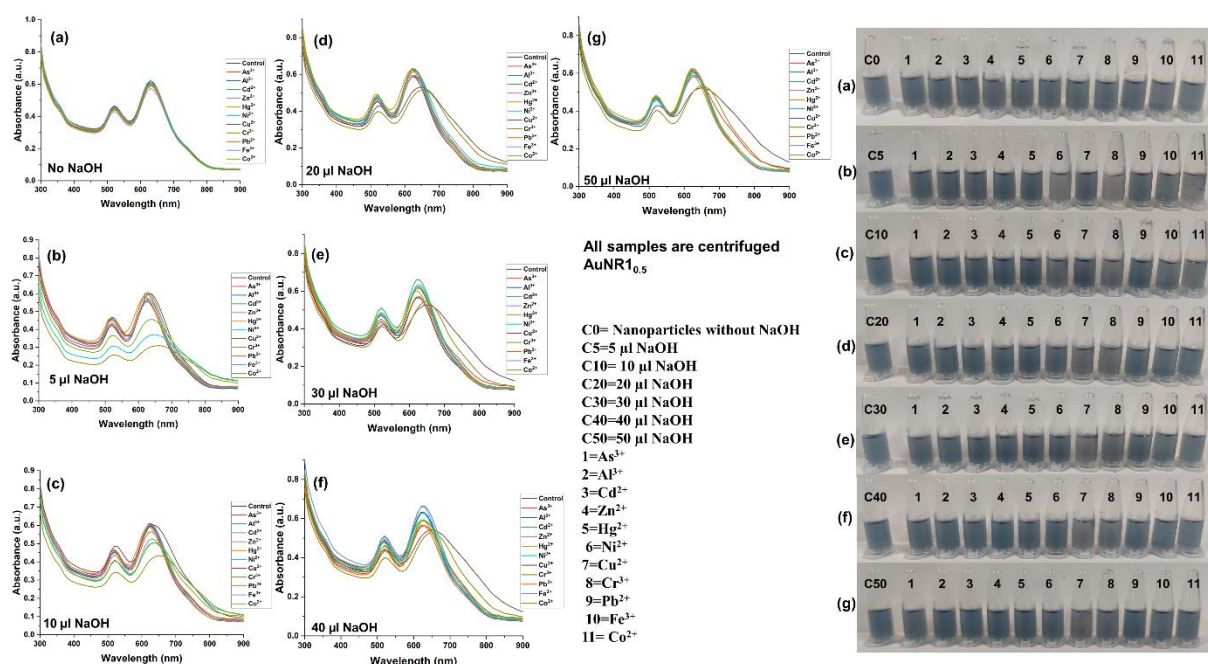

**Figure S11:** Spectrophotometric and colorimetric detection of heavy metal ions using centrifuged CTAB-AuNR1 at 0.5 OD in the absence (a) and presence (b-g) of NaOH (5-50 µL).

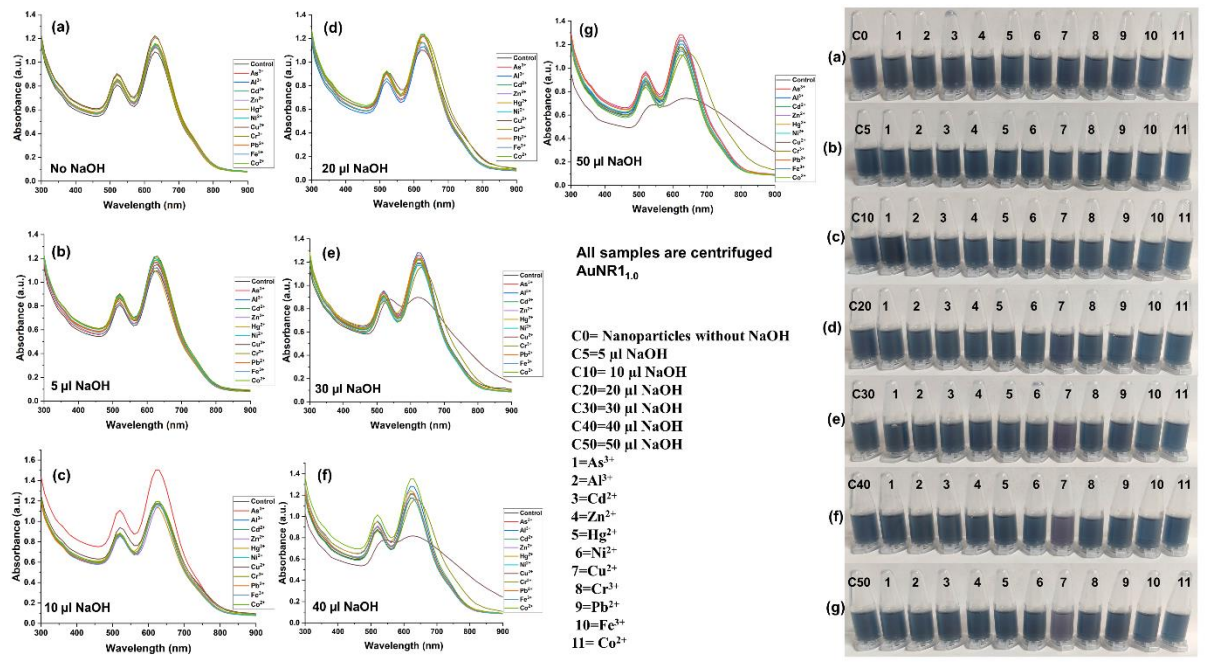

**Figure S12:** Spectrophotometric and colorimetric detection of heavy metal ions using centrifuged CTAB-AuNR1 at 1 OD in the absence (a) and presence (b-g) of NaOH (5-50 µL).

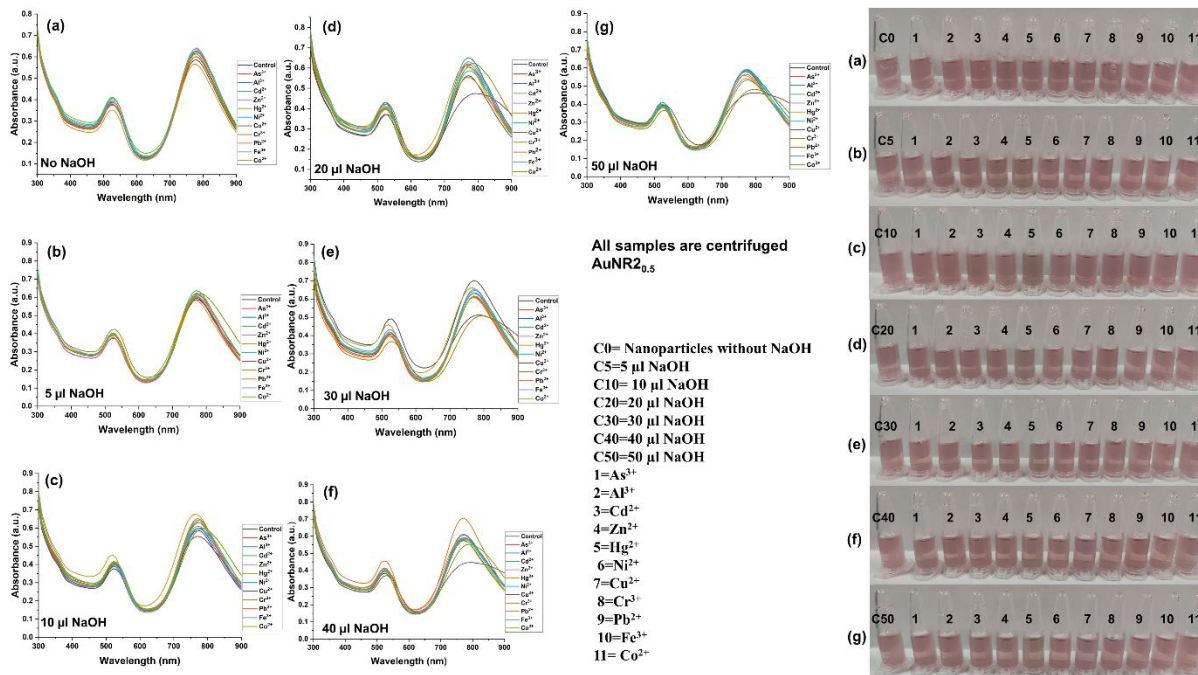

**Figure S13:** Spectrophotometric and colorimetric detection of heavy metal ions using centrifuged CTAB-AuNR<sub>2</sub> at 0.5 OD in the absence (a) and presence (b-g) of NaOH (5-50  $\mu\text{L}$ ).

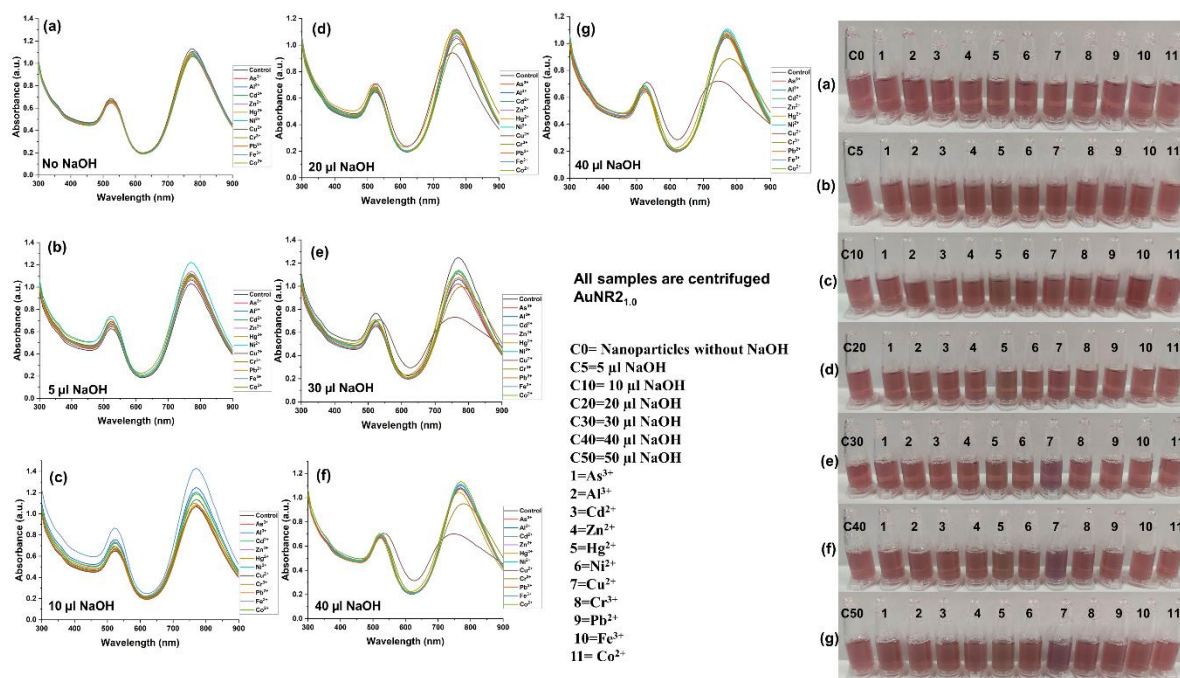

**Figure S14:** Spectrophotometric and colorimetric detection of heavy metal ions using centrifuged CTAB-AuNR<sub>2</sub> at 1 OD in the absence (a) and presence (b-g) of NaOH (5-50  $\mu\text{L}$ ).



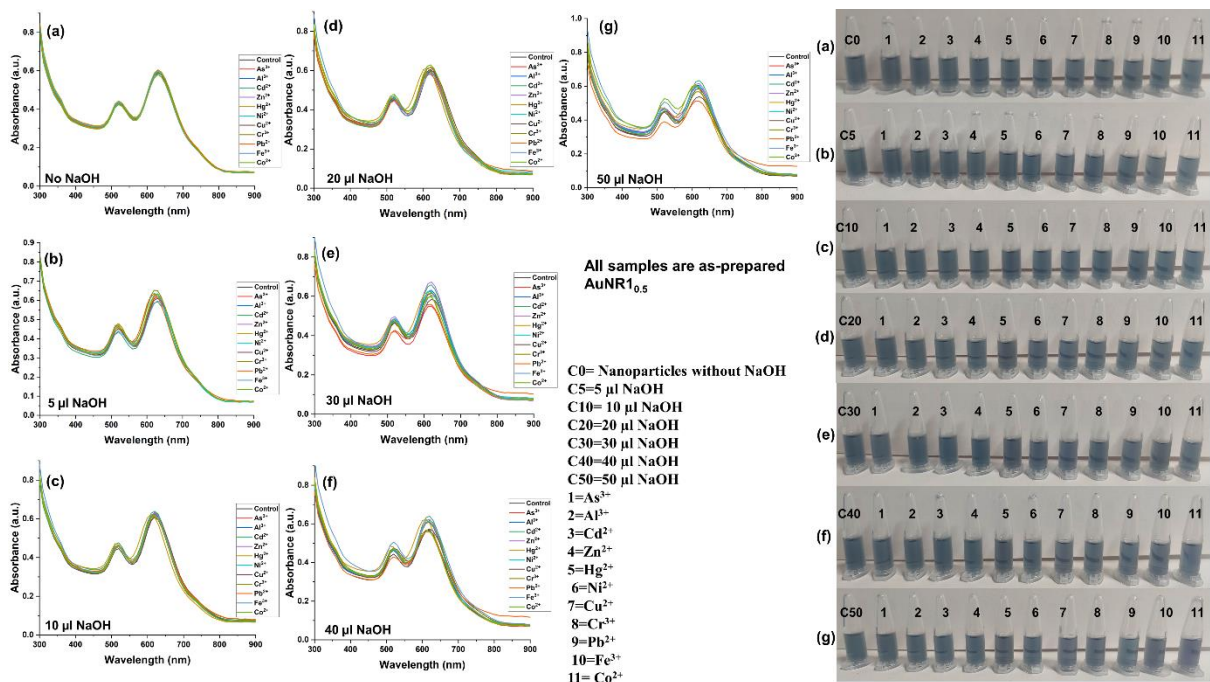

**Figure S15:** Spectrophotometric and colorimetric detection of heavy metal ions using as-prepared CTAB-AuNR1 at 0.5 OD in the absence (a) and presence (b-g) of NaOH (5-50 µL).

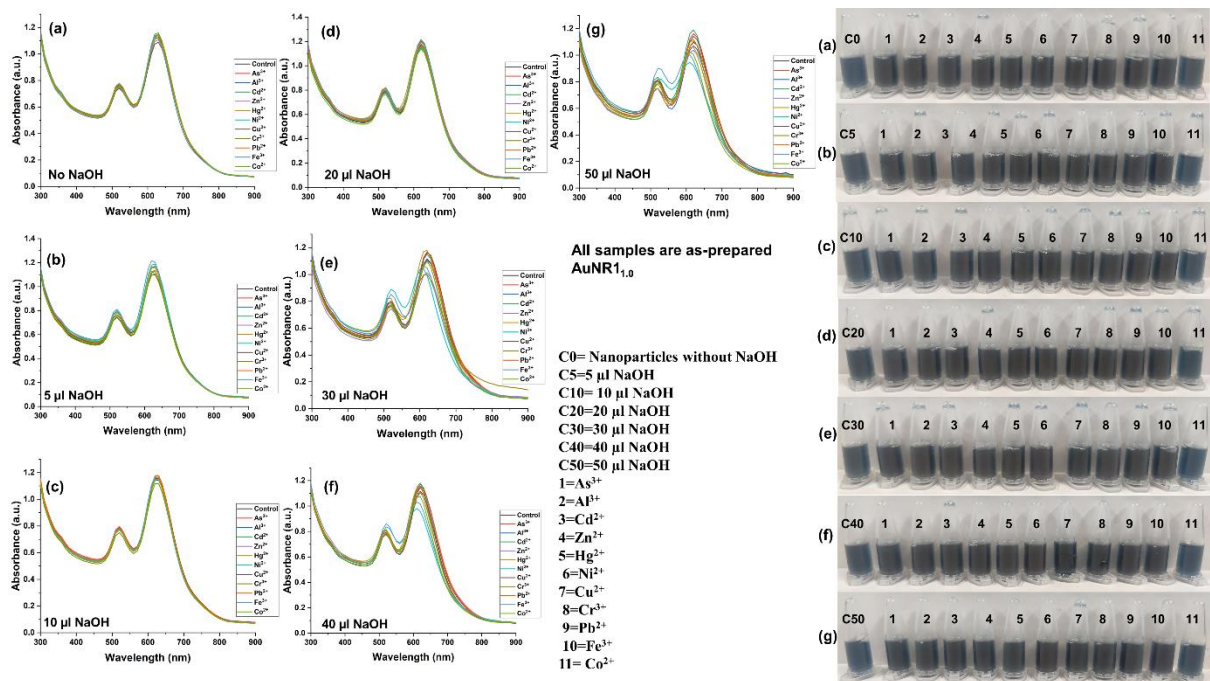

**Figure S16:** Spectrophotometric and colorimetric detection of heavy metal ions using as-prepared CTAB-AuNR1 at 1 OD in the absence (a) and presence (b-g) of NaOH (5-50 µL).

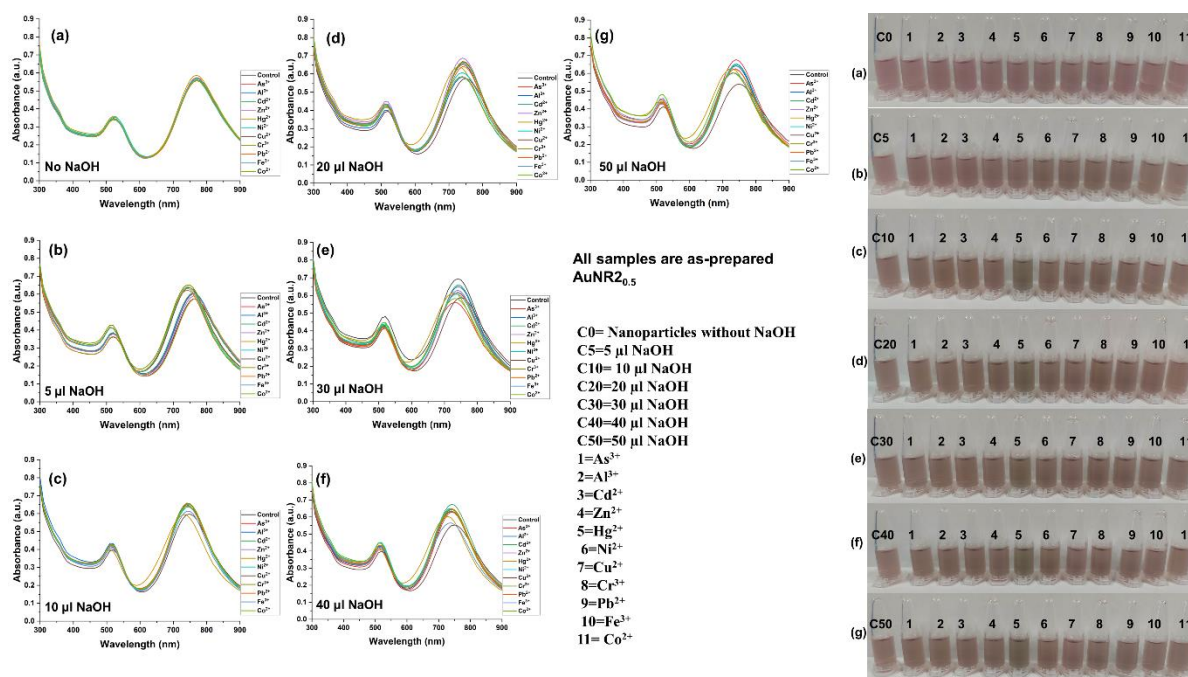

**Figure S17:** Spectrophotometric and colorimetric detection of heavy metal ions using as-prepared CTAB-AuNR2 at 0.5 OD in the absence (a) and presence (b-g) of NaOH (5-50  $\mu$ L).

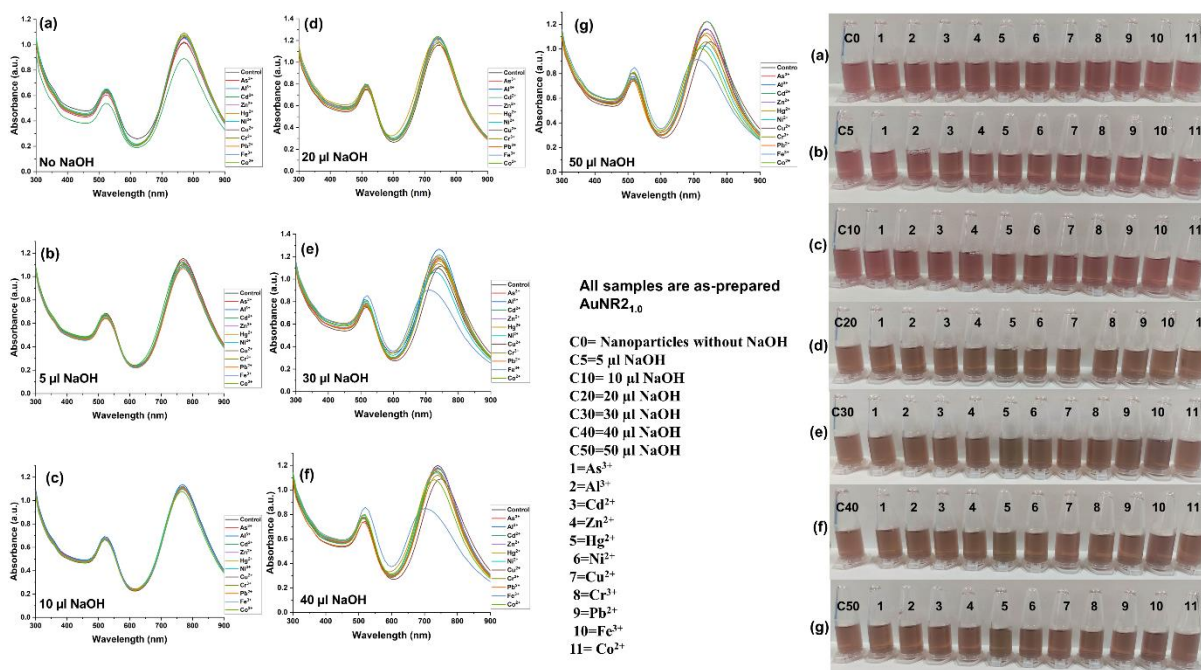

**Figure S18:** Spectrophotometric and colorimetric detection of heavy metal ions using as-prepared CTAB-AuNR2 at 1 OD in the absence (a) and presence (b-g) of NaOH (5-50  $\mu$ L).

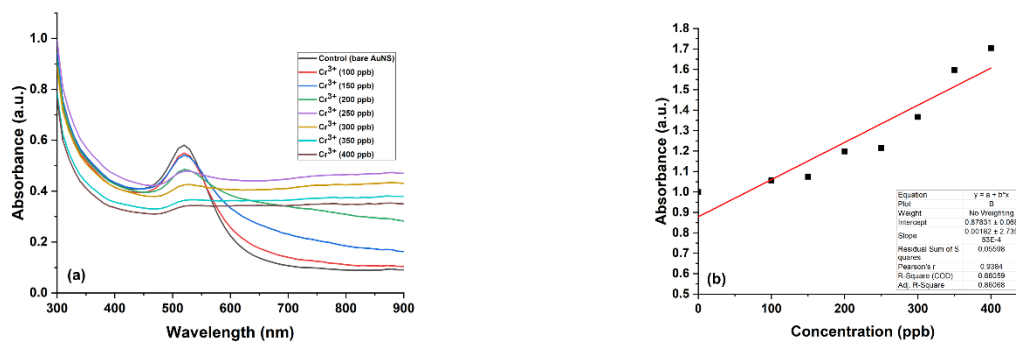

**Figure S19:** Optical absorbance of (a) bare AuNS with different concentrations of chromium ion and (b) Linear plot for quantification of LOD and LOQ of chromium.

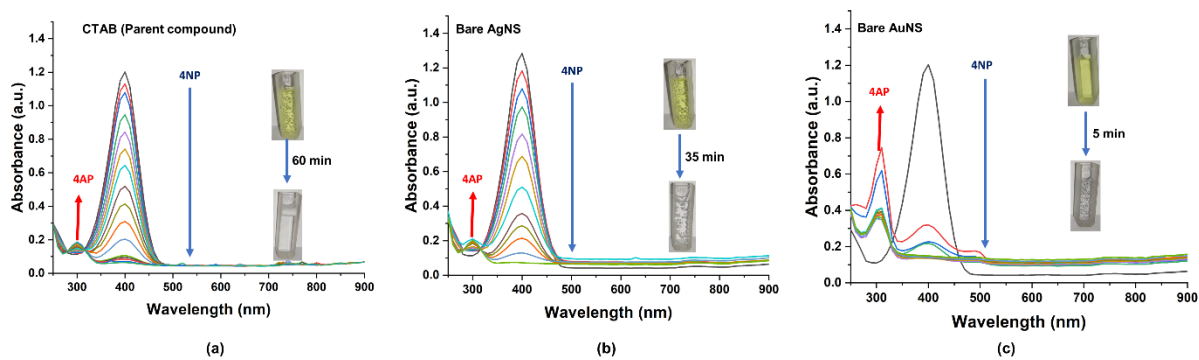

**Figure S20:** Catalytic degradation of 4-NP using a) CTAB, b) Bare AgNS and c) Bare AuNS.
